# Supplementary material for: Phenylalkanoid Glycosides (Non-Salicinoids) from Wood Chips of Salix triandra × dasyclados Hybrid Willow
Source: PubMed Central journal article supplement (PMC6470679; doi:10.3390/molecules24061152), 2019-03-23
Supplement: molecules-24-01152-s001.pdf [file molecules-24-01152-s001.pdf]

# Supporting Information

## Phenylalkanoid Glycosides (Non-Salicinoids) from Wood Chips of *Salix triandra* × *dasyclados* Hybrid Willow

Clarice Noleto-Dias, Yanqi Wu, Alice Bellisai, William Macalpine, Michael H. Beale, and Jane L. Ward

### Contents

Table S1: NMR chemical shift data of *p*-hydroxybenzylacetone- $\beta$ -D-glucopyranoside (**5**)

Table S2. NMR chemical shift data of chavicol- $\alpha$ -L-arabinofuranosyl-(1'' $\rightarrow$ 6')- $\beta$ -D-glucopyranoside (**18**) and chavicol-- $\beta$ -D-apiofuranosyl-(1'' $\rightarrow$ 6')- $\beta$ -D-glucopyranoside (**20**)

Table 1. NMR chemical shift data of *p*-hydroxybenzylacetone- $\beta$ -D-glucopyranoside (**5**).

| Pos <sup>n</sup> | $\delta_c^a$ | $\delta_H^a$ | $J_{H-H}$ (Hz);<br><i>multiplicity</i> <sup>b</sup> | COSY | HMBC                 | $\delta_c^{c,d}$ | $\delta_H^{c,d}$ | $J_{H-H}$ (Hz);<br><i>multiplicity</i> <sup>b,c,d</sup> |
|------------------|--------------|--------------|-----------------------------------------------------|------|----------------------|------------------|------------------|---------------------------------------------------------|
| 1                | 158.0        | -            | -                                                   | -    | -                    | 157.1            | -                | -                                                       |
| 2                | 119.7        | 7.07         | 8.6; <i>d</i>                                       | H-3  | C-1, C-3/5, C-4      | 118.0            | 7.11             | 8.4; <i>d</i>                                           |
| 3                | 132.5        | 7.23         | 8.6; <i>d</i>                                       | H-2  | C-1, C-2/6, C-7      | 130.1            | 7.00             | 8.4; <i>d</i>                                           |
| 4                | 138.6        | -            | -                                                   | -    | -                    | 136.2            | -                | -                                                       |
| 5                | 132.5        | 7.23         | 8.6; <i>d</i>                                       | H-6  | C-1, C-2/6, C-7      | 130.1            | 7.00             | 8.4; <i>d</i>                                           |
| 6                | 119.7        | 7.07         | 8.6; <i>d</i>                                       | H-5  | C-1, C-3/5, C-4      | 118.0            | 7.11             | 8.4; <i>d</i>                                           |
| 7                | 31.4         | 2.86         | <i>m</i>                                            | -    | C-3/5, C-4, C-8, C-9 | 30.2             | 2.78             | <i>m</i>                                                |
| 8                | 47.5         | 2.88         | <i>m</i>                                            | -    | C-4, C-7, C-9        | 46.2             | 2.78             | <i>m</i>                                                |
| 9                | 218.5        | -            | -                                                   | -    | -                    | 211.0            | -                | -                                                       |
| 10               | 32.3         | 2.19         | <i>s</i>                                            | -    | C-9                  | 30.2             | 2.11             | <i>s</i>                                                |
| 1'               | 103.4        | 5.05         | 7.7; <i>d</i>                                       | H-2' | C-1                  | 102.4            | 4.87             | 7.8; <i>d</i>                                           |
| 2'               | 75.9         | 3.53         | 7.8; <i>d</i>                                       | H-1' | C-3'                 | 75.1             | 3.39-4.40        | <i>m</i>                                                |
| 3'               | 78.6         | 3.58         | 9.0; <i>d</i>                                       | -    | C-2', C-4'           | 78.3             | 3.39-4.40        | <i>m</i>                                                |
| 4'               | 72.6         | 3.47         | 9.0                                                 | -    | C-5'                 | 71.6             | 3.39-4.40        | <i>m</i>                                                |
| 5'               | 78.9         | 3.43         | <i>m</i>                                            | H-6' | C-4'                 | 78.2             | 3.39-4.40        | <i>m</i>                                                |
| 6'               | 63.7         | 3.92         | 12.4, 2.1; <i>dd</i>                                | H-5' | C-5'                 | 62.7             | 3.39-4.40        | <i>m</i>                                                |
|                  |              | 3.73         | 12.4, 5.8; <i>dd</i>                                |      |                      |                  |                  |                                                         |

<sup>a</sup> Data collected in 80:20 D<sub>2</sub>O:CD<sub>3</sub>OD (4:1). Spectra were referenced to TSP-d4 at  $\delta$ 0.00.

<sup>b</sup> *s* singlet; *d* doublet; *dd* double doublet; *m* multiplet.

<sup>c</sup> Data collected in CD<sub>3</sub>OD.

<sup>d</sup> Gao, L.; Xu, X.; Yang, J. Chemical constituents of the roots of *Rheum officinale*. *Chem. Nat. Compd.* **2013**, *49*, 603–605, doi:10.1007/s10600-013-0689-7.

Table S2: NMR chemical shift data of chavicol- $\alpha$ -L-arabinofuranosyl-(1'' $\rightarrow$ 6')- $\beta$ -D-glucopyranoside (**18**) and chavicol-- $\beta$ -D-apiofuranosyl-(1'' $\rightarrow$ 6')- $\beta$ -D-glucopyranoside (**20**)

| Pos <sup>n</sup> | <b>18</b>  |            |                                                            |              |                     | <b>20</b>  |            |                                                     |              |                            |
|------------------|------------|------------|------------------------------------------------------------|--------------|---------------------|------------|------------|-----------------------------------------------------|--------------|----------------------------|
|                  | $\delta_c$ | $\delta_H$ | $J_{H-H}$ (Hz);<br><i>multiplicity</i> <sup>a</sup>        | COSY         | HMBC                | $\delta_c$ | $\delta_H$ | $J_{H-H}$ (Hz);<br><i>multiplicity</i> <sup>a</sup> | COSY         | HMBC                       |
| 1                | 158.1      | -          | -                                                          | -            | -                   | 158.1      | -          | -                                                   | -            | -                          |
| 2                | 119.9      | 7.07       | 8.7; <i>d</i>                                              | H-3/5        | C-1, C-4, C-3/5     | 119.8      | 7.07       | 8.6; <i>d</i>                                       | H-3/5        | C-1, C-4, C-3/5            |
| 3                | 132.9      | 7.22       | 8.7; <i>d</i>                                              | H-2/6        | C-1, C-2/6          | 132.8      | 7.22       | 8.6; <i>d</i>                                       | H-2/6        | C-1, C-2/6, C-7            |
| 4                | 138.5      |            |                                                            |              |                     | 138.4      |            |                                                     |              |                            |
| 5                | 132.9      | 7.22       | 8.7; <i>d</i>                                              | H-2/6        | C-1, C-2/6          | 132.8      | 7.22       | 8.6; <i>d</i>                                       | H-2/6        | C-1, C-2/6, C-7            |
| 6                | 119.9      | 7.07       | 8.7; <i>d</i>                                              | H-3/5        | C-1, C-4, C-3/5     | 119.8      | 7.07       | 8.6; <i>d</i>                                       | H-3/5        | C-1, C-4, C-3/5            |
| 7                | 41.7       | 3.36       | 6.7; <i>d</i>                                              | H-8          |                     | 41.6       | 3.36       | 6.9; <i>d</i>                                       | H-8          | C-2/6, C-3/5, C-4, C-8     |
| 8                | 141.5      | 6.01       | 16.9, 10.1,<br>6.7; <i>ddt</i>                             | H-7, H-9     |                     | 141.3      | 6.01       | 16.9, 10.1,<br>6.7; <i>ddt</i>                      | H-7, H-9     | C-4, C-7                   |
| 9                | 118.6      | 5.07       | <i>m</i>                                                   | H-8          |                     | 118.4      | 5.08       | <i>m</i>                                            | H-8          | C7, C8                     |
| 1'               | 103.5      | 5.04       | 7.7; <i>d</i>                                              | H-2'         | C-1, C-4'           | 103.5      | 5.03       | 7.6; <i>d</i>                                       | H-2'         | C-1, C-2'                  |
| 2'               | 76.0       | 3.54       | 7.7; <i>d</i>                                              | H-1'         | C-1'                | 78.5       | 3.53       | 7.6; <i>d</i>                                       | H-1', H-3'   | C-1', C-3'                 |
| 3'               | 72.7       | 3.50       | 9.1; <i>d</i>                                              |              | C-1'                | 76.1       | 3.56       | 8.9; <i>d</i>                                       | H-2'         | C-4'                       |
| 4'               | 78.6       | 3.57       | 9.0; <i>d</i>                                              |              | C-3'                | 72.6       | 3.48       | 9.2; <i>d</i>                                       |              | C-5', C-6'                 |
| 5'               | 78.1       | 3.73       | <i>m</i>                                                   |              |                     | 77.9       | 3.7        | <i>m</i>                                            | H-6'         |                            |
| 6'               | 69.8       | 4.04       | 11.1; <i>d</i>                                             |              | C-3', C-1''         | 70.7       | 4.02       | 2.3, 11.4;<br>3.72<br><i>dd</i><br><i>m</i>         | H-5'         | C-4', C-5', C-1''          |
| 1''              | 111.2      | 5.00       | 1.3; <i>d</i>                                              | H-2''        | C-6', C-3'', C-4''  | 112.2      | 5.05       | 3.1; <i>d</i>                                       | H-2''        | C-6', C-2'', C-3'', C-4''  |
| 2''              | 84.2       | 4.06       | 1.5, 3.3; <i>dd</i>                                        | H-1'', H-3'' | C-1'', C-3''        | 79.6       | 3.94       | 3.1; <i>d</i>                                       | H-1''        | C-1'', C-5''               |
| 3''              | 79.7       | 3.89       | 3.3, 5.9; <i>dd</i>                                        | H-2''        | C-2'', C-4'', C-5'' | 82.3       | -          | -                                                   | -            | -                          |
| 4''              | 87.0       | 4.00       | 3.3; 5.9; <i>dd</i>                                        |              | C-2'', C-3'', C-5'' | 76.6       | 3.83       | 10.1; <i>d</i><br>3.99<br>10.1; <i>d</i>            | H-4'', H-5'' | C-1'', C-2'', C-3'', C-5'' |
| 5''              | 64.1       | 3.74       | 3.3, 12.3;<br><i>dd</i><br>3.64<br>5.7, 12.3;<br><i>dd</i> |              | C-3'', C-4''        | 66.5       | 3.6        | <i>s</i>                                            | H-4''        | C-2'', C-3'', C-4''        |

Data collected in 80:20 D<sub>2</sub>O:CD<sub>3</sub>OD (4:1). Spectra were referenced to TSP-d4 at  $\delta$ 0.00.

<sup>a</sup> *s* singlet; *d* doublet; *dd* double doublet; *m* multiplet.
